# Supplementary material for: Gut Microbial Dysbiosis and Changes in Fecal Metabolic Phenotype in Precancerous Lesions of Gastric Cancer Induced With N-Methyl-N′-Nitro-N-Nitrosoguanidine, Sodium Salicylate, Ranitidine, and Irregular Diet
Source: Frontiers journal article supplement (doi:10.3389/fphys.2021.733979), 2021-11-04
Supplement: Table_1.XLS [file Table_1.XLS]

## Sheet: 差异代谢详情表
Metabolite	Formula	VIP_pred_OPLS-DA	VIP_PLS-DA	FC(Y/X)	P_value	M6	M2	M1	M3	M4	M5	C4	C5	C6	C1	C2	C3
N-arachidonoyl tyrosine	C29H41NO4	11.3507	11.3028	6.1857	5.982e-13	208090	199575	203107	209488	203836	223578	31186.7	34327.7	41048.8	29765.8	32591.5	32710.7
1b,3a,12a-Trihydroxy-5b-cholanoic acid	C24H40O5	10.9706	10.6626	0.0896	0.04306	39526.9	17913.3	17584.6	19672.1	49235.4	9835.92	701276	497086	17364.9	333975	31413.9	136310
Deoxycholic acid	C24H40O4	10.3298	10.3484	0.6482	0.008939	479740	385261	289772	415800	404687	274239	742575	528574	492363	513008	748530	445641
PI(17:1(9Z)/22:2(13Z,16Z))	-	9.6808	9.5682	2976.44	7.928e-07	141557	152080	79983.4	111586	135895	159436	41.0005	43.7739	42.2518	45.8963	40.7476	48.5775
PC(16:0/0:0)[U] / PC(16:0/0:0)[rac]	-	9.0627	8.989	0.4909	0.03449	155686	162322	241239	158143	159149	125061	228004	139464	588405	429531	227801	426702
Ursodeoxycholic acid	C24H40O4	8.5	8.5154	0.6283	0.001209	223065	219155	185556	235285	203587	158567	373188	325832	250359	321856	408970	269846
cis-9,10-Epoxystearic acid	-	8.1978	8.137	3.637	0.00467	147432	167966	72800	266569	233679	89010.1	54247	29109.9	79283.2	49373.2	18158.4	38593.7
Pregnan-20-one, 17-(acetyloxy)-3-hydroxy-6-methyl-, (3a,5b,6a)-	-	7.9849	8.1695	0.3124	0.005887	53684.4	34125.1	61645.1	68283.4	67427.8	44378.8	207089	233452	69277.1	122952	295357	126434
12(13)-EpOME-d	-	6.9327	6.9819	2.1815	0.003742	126684	178717	98338.2	181727	206809	143604	81025.6	34410.3	125464	96062.7	26153.4	65956.4
Coflodiol	C30H50O2	6.8958	7.1259	0.1551	0.01892	19591.8	18434.3	20087.6	13447.8	16064.2	25842.3	102078	155885	111694	40355.7	281637	39597
DG(15:0/16:1(9Z)/0:0)	C34H64O5	6.8613	6.7898	6.8347	1.057e-07	64682	91768.6	61937.2	73060	76532.4	85970.6	9114.88	12287.2	14121.5	9172.56	10288.9	11425.5
13(S)-HODE	-	6.7751	6.7811	3.2121	0.001627	92719.7	184374	70398.2	96058.6	142503	87274.6	38040.3	29795.8	38534.6	46671.5	14130.5	42423.1
LysoPC(18:1(11Z))	C26H52NO7P	6.6158	6.6191	0.3125	0.003252	28418	38253.9	50740.2	26683.9	25869.4	35541.6	68177.6	74258.6	123406	150275	65913.5	175748
3β-Hydroxycholest-5-en-26-oic acid	-	6.0719	5.9604	0.1319	0.005779	6604.64	18362.8	11714	6096.73	5600.07	10213.3	56748.4	36155.6	94619.9	156081	47569.5	53053.9
PI(P-18:0/22:6(4Z,7Z,10Z,13Z,16Z,19Z))	-	5.7623	5.7035	119.418	1.241e-08	41942.7	39357	38827.8	46258.1	53043.3	53633.1	32.6826	110.458	853.703	694.718	223.357	371.742
10-keto stearic acid	-	5.6707	5.6336	2.306	0.008927	69942.2	91533.4	79692.6	113593	145124	131362	47559	16556.7	107806	53939.4	26784.8	21064.1
1-Linoleoylglycerophosphocholine	C27H53NO7P	5.4651	5.4418	0.4019	0.006243	35598.3	46347.4	46545	25081.3	39617.9	21909.5	69076.5	63156.8	86325.3	116275	52405.5	147962
LysoPC(0:0/18:0)	C26H54NO7P	5.3144	5.323	0.451	0.03774	46795.3	59190.6	55163.8	51325.6	43784.1	41172.1	69160.4	46645.6	199795	163860	63941.9	115789
8-hydroxy-9-octadecenoic acid	-	5.2733	5.2124	8.2188	0.004067	45420.3	24985.7	64178	22574.2	65314.2	108385	5588.18	5784.86	10759.3	5004.89	9506.79	3611.3
Cucurbitacin D	C30H44O7	5.1645	5.1178	2.6176	3.993e-09	57325.7	56071.3	55127.6	59609	56899.3	66132.7	22294.9	24636.4	24238.9	18744.1	24232.2	20035.7
26,26,26-trifluoro-25-hydroxyvitamin D3	-	5.0392	4.9845	3.5673	1.924e-08	49167.2	45151.4	38857.2	52912.3	52217.3	49587	13045	12982	14196.7	13383.6	14541.2	12549.7
1α,25-dihydroxy-3α-methyl-3-deoxyvitamin D3	-	5.0118	5.0197	0.2422	0.001137	18167.1	8922.66	13073.7	15525.2	14012.4	10840.6	50658	47281.4	85878.3	40777.3	79549.7	28245.7
Tryptophyl-Hydroxyproline	C16H19N3O4	4.8653	4.8221	14.2487	5.607e-09	32468.8	35345.4	27941.6	39650.7	38817	33435.2	3004.05	2327.42	2491.43	2072.93	2279	2400.24
9,10-epoxy-12-octadecenoic acid	-	4.7207	4.6336	6.3232	0.0008167	33904.3	32395	27832.4	76786.1	45820.3	34002.5	5567.61	6074.46	10612.8	5193.68	6240.08	5964.49
β-Amyrin	-	4.6561	4.7075	0.1848	0.000575	7645.44	8485.79	9865.87	7194.37	7214.87	8297.26	37153.2	48506	54273.5	24708.7	71357.7	27587
13-hydroxyoctadecanoic acid	C18H36O3	4.642	4.7116	4.395	0.0006128	48115.7	28942.6	64497.7	23010	51668.9	56154.3	6340.13	6444.11	7867.99	9498.18	23980.6	7856.55
N-oleoyl glutamic acid	-	4.5913	4.6278	4.2917	0.001791	39563.2	60074.9	62429.9	28270.7	19835.5	72323.7	10425.4	11447.7	13464.1	9415.15	10875.4	10194.2
Phenylalanyl-Valine	C14H20N2O3	4.3459	4.3483	0.1724	7.864e-09	5404.34	5404.76	4461.35	6000.03	5920.35	5449.59	31777.2	29501.2	38070.3	27402.7	32009.5	30523.4
1α,25-dihydroxy-26,27-dimethyl-20,21,22,22,23,23-hexadehydrovitamin D3	-	4.2169	4.1938	3.3114	3.083e-09	37715.3	31229.5	32245.1	36171.5	38062	33193	9137.79	10848.2	10224.8	10157	12090	10544.5
Pro Ser Thr Lys	-	4.2109	4.2075	3.8443	1.139e-09	31846.3	33044.6	34258.6	29952.4	32121	36367.7	7402.82	8848.43	11278.9	9035.51	6156.07	8673.28
12,13-epoxy-9-octadecenoic acid	-	4.1887	4.1459	5.0973	0.02141	28116.3	41058.7	9732.28	77215.5	81434.3	21898	5396.56	4182.75	27784.2	7275.38	2542.33	3717.42
1α-hydroxy-25,26,27-trinorvitamin D3 24-carboxylic acid	-	4.1442	4.1233	0.384	1.319e-06	15151.8	14227.9	13313.2	16671.9	17648.4	13704.3	40533.8	41227.5	35508.8	46453.3	41978.5	30544.4
Vaccenic acid	C18H34O2	4.1295	4.2043	1.8305	0.01316	57364.8	85529.3	59922.6	86440.2	95017.2	66577.3	48472	17847.7	75888.1	54494.1	18225.6	31359.9
PI(18:1(9Z)/22:2(13Z,16Z))	-	3.9226	3.9515	9786.59	0.0009104	52279.6	19410.6	18500.6	26920.3	20849.1	16094.1	0.0925	0.0988	0.0953	0.1036	15.2449	0.1096
Sebacic acid	C10H18O4	3.8704	3.8675	1.8897	0.001943	42938.9	49884.8	65660.7	43991.8	42422.9	76753.9	27330	28952.2	32787	24453.3	32864.6	23822.7
1α,25-dihydroxy-22,23-didehydro-24a,24b-dihomovitamin D3	-	3.8399	3.9075	0.736	0.00118	64874.1	71295.4	63272.1	62703.2	75403.2	75751.7	82416.9	77721.4	109143	104205	94149.4	93917.9
11-Hydroxyvitamin D3	-	3.753	3.686	0.2215	0.000258	7475.95	3865.34	7187.31	6530.31	6040.24	5237.29	25581.2	22624	36490	40612.9	22966.1	15757
9-OxoODE	C18H30O3	3.7254	3.7437	3.2519	0.002765	28431	56054.1	23956.3	32684.9	49607.9	20013.8	12010.6	8226.11	10818.2	16654.4	4205.99	12900.4
Glabric acid	C30H46O5	3.6453	3.6236	4.4374	4.744e-11	23311.2	21396	22478.4	24266	23515.4	24201.5	4898.68	5637.26	6017.14	3797.82	6512.01	4491.01
(-)-Stercobilin	C33H46N4O6	3.6197	3.5961	0.4631	8.296e-06	17231.8	18043.3	17831.9	14695	15267	14397.5	32328.9	37999.4	44511.1	30492.4	33205.1	31871.9
DG(20:3(5Z,8Z,11Z)/18:2(9Z,12Z)/0:0)	C41H70O5	3.5969	3.6035	2.2757	4.781e-07	34928.5	34721.4	30280.3	32841.1	32461.5	31383.6	14066.5	12718.2	20857.7	15476.6	11996.7	11259.9
Ile Glu Lys Lys	-	3.5605	3.5147	2.826	1.543e-06	27428.9	26010.6	24941.8	26339.6	24122.8	35026.4	7912.06	9518.88	11918.7	8308.85	11640.5	8685.21
Camelliagenin A	C30H50O4	3.5284	3.388	0.4009	0.02909	19921.7	21924.6	14862.1	16160	15130.9	12190.9	71835.9	26455.9	22370.6	72521.1	28972.7	27780
(±)12,13-DiHOME	-	3.4794	3.4423	3.4519	8.999e-05	25196.7	25822.2	17863	36163.4	29227	18237.7	6541.1	8267.12	9213.56	6510.99	5837.56	7813.67
Dynorphin A (6-8)	C18H37N9O4	3.4312	3.3999	3.2451	1.753e-09	23159.4	21570.1	20411.2	24571.5	23781.1	24756	6751.32	7606.85	8284.96	6422.78	7437.2	6096.47
(22E,24R)-Stigmasta-4,22-diene-3,6-dione	C29H44O2	3.4208	3.4742	0.3031	0.0006517	7773.14	7881.12	8757.61	7028.46	6740.99	12885	28230.8	35752.6	28417.4	15102.1	40986.2	20011.2
LysoPE(0:0/18:0)	C23H48NO7P	3.4115	3.4104	0.3448	0.02443	9242.81	11077.2	17903.4	11690.8	8322.14	16158	22076.3	16336.5	45594.6	63821.2	13369.2	54571.5
p-Acetaminobenzaldehyde	-	3.3246	3.3366	0.303	0.001292	4254.82	3759.72	11791.3	5025.35	3684.3	19901.6	18222.4	34094.4	22584	32557.7	17952.8	34397.4
21-hydroxypregnenolone	C21H32O3	3.3201	3.2926	0.228	0.01707	2219.83	16719.4	8564.18	3623.01	6136.66	1388.21	4047.21	36016	18572	57088.8	24306.4	29512.1
9(R)-HODE	-	3.2989	3.2693	4.1019	2.289e-06	21402.6	19168.1	15805	26119.8	22308.7	16897.6	4314.32	4923.41	6676.52	4259.39	4340.12	5150.2
PG(19:1(9Z)/0:0)	-	3.2739	3.4601	5.4913	0.0154	15280.2	12598	61807.9	36179.8	15233.8	25873.3	4793.16	3497.68	9590.16	7386.5	297.883	4843.32
D8'-Merulinic acid A	C24H38O4	3.2414	3.3914	0.114	0.03687	2440.9	1295.07	3713.18	5010.31	4849.7	1987.43	29770.2	44521.1	4536.45	11313.2	69956.4	9127.82
17-Allylestra-1,3,5(10)-triene-3,17beta-diol	-	3.2386	3.2047	2.6036	5.569e-06	22696	30010.7	20170.1	21083.5	25053.9	26063	7427.75	9553.53	12954.1	7244.76	9744.75	8799.76
DG(20:3(5Z,8Z,11Z)/18:3(6Z,9Z,12Z)/0:0)	C41H68O5	3.2103	3.2228	2.1998	2.362e-05	29623	33941.8	23545	26220.8	27033.4	28727.5	13507.7	9716.13	17484.3	16190.4	7915.53	12022.2
FAHFA(22:6(4Z,7Z,10Z,13Z,16Z,19Z)/9-O-18:2(10E,12Z))	C40H62O4	3.1784	3.1446	9.9752	1.371e-05	15704.6	22596.6	8790.49	15886	18397.1	15341.3	2041.57	1512.29	1882.59	1372.64	1353.13	1536
Pinolenic Acid	-	3.1627	3.1277	5.3945	0.006601	15263.2	22939.1	7844.37	33390.8	39010.4	12858.4	3304.31	2335.1	11426.8	3610.05	1409.49	2250.3
PC(22:5(7Z,10Z,13Z,16Z,19Z)/P-18:0)	C48H86NO7P	3.1469	3.15	0.6314	0.002438	34992.3	32309.8	26817.2	28584	30933.1	22210.5	56907.5	45723.9	37268.2	40377.3	59053.7	39194.4
Cryptomeridiol 11-rhamnoside	C21H38O6	3.1433	3.1363	0.3627	0.006994	9001.48	16133.1	11291.7	7919.33	10911	6032.36	11955.9	25735.4	24769.7	47734.8	21688.3	37009.8
Ser Tyr Ile	-	3.1383	3.0943	1.6783	4.341e-06	32463	33930.7	29682.8	37018.1	37605	34903	22491.8	20572.2	23456.3	16836.7	20091.7	19097
N-Acetyl-leu-leu-leu-tyr-amide	-	3.1191	3.1034	23.1246	1.291e-10	14694.9	14639.7	12416	13726.4	12324	15031.9	538.497	847.716	484.312	376.01	917.381	419.067
Gln Val Leu Arg	-	3.1187	3.0881	1.3775	5.051e-06	49369.4	47967.4	48607.6	53044	49438.4	53273.9	37443.5	39510.5	39407.6	33362.9	37105.4	32182.8
Corchorifatty acid D	C18H28O4	3.0789	3.0515	3.331	1.629e-06	18522.7	21705.4	17749.7	17232.6	17100.9	21860.4	2607.29	5717.29	9511.94	4601.81	7345.6	4495.47
PA(19:0/0:0)	-	3.0525	3.0192	2.2601	7.019e-08	22891.3	20766.8	20705.4	24570.7	24280.9	23893.4	9295.39	10237.6	12353.5	8805.1	11118	8861.8
PI(16:1(9Z)/21:0)	-	3.041	2.9979	670.49	1.541e-06	13758.2	13691	7669.89	11404.9	13531	17119.8	17.9944	19.2116	18.5436	20.1431	17.8834	21.3198
7a,12a-Dihydroxy-3-oxo-4-cholenoic acid	C24H36O5	3.0103	2.9953	0.6574	0.0001651	27121.7	24401.8	26220.9	28458	28350.7	25721.4	38345.5	45207.1	43754.1	43183.9	43100.4	30161.7
9,10-DiHODE	C18H32O4	2.9693	2.9526	4.4494	4.874e-05	15517.9	24956.6	12269.1	15177.1	19490	13956.4	2444.38	2863.93	5313.68	4272.96	4242.06	3638.97
Adenine	C5H5N5	2.9688	2.9689	12.0792	5.827e-08	13820.8	15007	11410.8	13560.9	14958.1	11764.4	1350.25	256.618	503.152	3963.3	224.969	366.555
Corosin	C30H46O7	2.9387	2.9383	0.2958	0.001134	5872.48	6457.17	5394.35	4536.98	5869.5	8113.38	25924.6	26125.3	27629.3	9793.17	21019.4	12033.4
Amasterol	C28H44O2	2.8583	2.8569	0.1949	0.0003995	3717.44	2229.02	4060.08	3151.07	3024.98	2713	12446.9	13246.1	25436.6	14046.7	21910.3	9873.5
1-Heptadecanoylglycerophosphoethanolamine	C22H46NO7P	2.8481	2.8297	8.5082	6.292e-10	13560.5	12994.1	10385.3	12683.3	12251.2	13061.5	1019.06	1015.04	1971	1804.31	1682.73	1316.81
4-Hydroxystyrene	C8H8O	2.7827	2.7902	8.6147	0.02166	25524	32663	461.163	25751.9	24700.7	211.835	8642.84	429.985	352.91	2118.62	318.375	824.951
Soyasapogenol C	C30H48O2	2.7717	2.8744	0.2602	0.0294	5608.96	6960.23	6198.43	4586.34	5226.36	8919.02	16992.3	30697.2	26547.6	7755.81	53360.8	8786.18
1α,25-dihydroxy-26,27-ethanovitamin D3	-	2.7627	2.7787	0.5987	7.264e-05	19784.2	19359.4	14773	14210.5	17260.7	18535.4	27493.9	28125.9	35933.6	24803.4	28825.5	28406.2
N-Oleoyl phenylalanine	C27H43NO3	2.735	2.719	3.4669	1.671e-05	13702.9	12549.1	17068.6	14522.7	12327.8	21207.4	4125.7	4730.83	5023.89	3733.07	5108.26	3633.9
PC(15:0/P-16:0)	C39H78NO7P	2.7217	2.7219	1.7926	0.0004373	28057.7	30231.2	20483.2	27500.5	27369	26107.9	14064.2	12575.8	23649.1	15360.3	11859.6	11598.3
Avenestergenin B2	C37H52O6	2.6662	2.6342	7.2392	4.793e-07	10173.7	10814.3	10130	10030.7	11832.8	15322.7	2268.98	1775.58	1147.66	808.908	1875.45	1558.35
3α,12α-Dihydroxy-5β-chola-7,14-dien-24-oic Acid	-	2.6648	2.7118	0.4108	0.003387	7293.37	7288.51	10482.3	9824.92	9891.99	9147.94	19338.3	32627.4	13604.9	19037.2	31379.4	15273.9
Stigmastentriol	C29H50O3	2.6615	2.6498	0.1466	1.769e-07	2032.88	1755.83	1542.95	1631.69	1559.86	1614.7	10652.9	9427.62	10884.2	14916.2	12302.7	10988.3
(±)12(13)-EpOME	-	2.6615	2.6487	3.8311	0.0004356	12174.4	23183.9	8623.08	13813.7	18524.5	14032	4332.91	3433.86	4887.88	5180.54	1303.57	4445.4
13-Hydroxyhexadecanoic acid	C16H32O3	2.6601	2.6777	3.6122	0.005479	16302.6	30951.1	9134.07	16029.5	25378.5	9717.64	5051.67	3450.66	5651.59	8820.06	1604.03	5185.1
1α,25-dihydroxy-9,11-didehydro-3-deoxyvitamin D3	-	2.6561	2.6802	0.3626	3.765e-05	6851.66	4399.83	3360.49	6914.73	6266.37	8406.63	16610.7	17073.1	22492.5	14216.2	13229.7	16208.5
Physangulide	C28H42O9	2.6435	2.6301	1.8442	8.737e-06	21680.7	22288.1	19712.4	23130.5	22869.8	22454.5	17185.5	11903.3	11455.9	9480.67	11333.9	10307.4
Zygadenine	-	2.5985	2.6063	2.9079	3.356e-06	15816.7	12336.7	16740	12623.2	13255.8	18093.3	4923.65	5767.14	6603.99	4175.52	4957.21	4128.68
25,26-epoxy-1α-hydroxyvitamin D3	-	2.596	2.6207	0.2406	0.0006119	3832.31	3533.17	3806.02	2627.68	3527.79	3750.95	16318.2	15251.3	14301.8	9614.14	23788.4	8344.59
(22E)-1α,3β-Dihydroxychola-5,16,22-trien-24-oic Acid	-	2.538	2.5374	0.5413	8.756e-05	11450.3	11898.7	11552.1	11286.4	12094.2	11282	18025.8	22646.2	22788.7	23322.4	25979.3	15703.6
1α,25-dihydroxyvitamin D2	-	2.5141	2.5327	0.2981	0.001455	4838.9	5258.79	3358.97	4714.46	4022.5	5344.54	14584.2	25518.8	18053	7364.51	13986.9	12907.9
Lys Gly His	-	2.5034	2.4979	4.9655	6.913e-09	9611.73	11585.4	11477	9867.4	9856.05	12353.2	2255.55	2238.62	2639.82	1794.86	2160.61	1949
(24R)-1α,24-dihydroxyvitamin D3	-	2.4831	2.4991	0.2505	0.0001132	3496.52	3103.89	3258.76	2828	3375.13	3147.03	12156.4	13041.7	14590.3	9468.32	19054.3	8389.48
(±)9-HpODE	-	2.483	2.4695	3.2127	2.172e-06	12305.5	15540.3	10306.1	13339.7	14097.3	10590.6	3172.15	3010.93	5456.7	4117.65	4039.8	3919.64
PI(20:4(5Z,8Z,11Z,14Z)/0:0)	-	2.4817	2.5125	0.4828	1.749e-05	8703.86	8206.52	7045.3	8385.89	8274.33	11237.9	16898.5	17803.7	22258.2	14354.1	18955.9	17122.1
(22E)-(25R)-1α,25,26-trihydroxy-22,23-didehydrovitamin D3	-	2.4778	2.4772	0.2462	8.448e-05	3902.88	3285.96	3277.87	2467.27	2437.44	2932.34	12902.9	13440.5	14903	9418.97	16667.2	7027.53
1α-hydroxy-26,27-dimethylvitamin D3	-	2.4707	2.4306	0.7503	0.02218	38897.1	37241.8	38960.7	38547.1	34395.8	34081	47362.6	45004	71102.8	44692.2	47245.4	40643.4
LysoPC(15:0)	C23H48NO7P	2.4442	2.4632	0.3565	0.006057	4422.96	5562.86	9042.31	4802.12	5710.82	6677.12	10284.5	9513.19	27632.8	16510.4	13281	24356.8
23-Acetoxysoladulcidine	C29H47NO4	2.432	2.454	0.4703	5.497e-05	9054.89	6738.33	8100.38	8265.33	7386.79	8792.23	16365.5	19165.1	15112.5	15177.2	22674	14267.5
Dimorphecolic acid	-	2.3951	2.3555	2.7239	2.955e-05	12255.7	11360.5	10291.5	13338.4	15381.8	15663	4077.23	4267.17	8240.78	3799.76	5100.29	3257.93
7,8-dichloro-hexadecanoic acid	-	2.3791	2.4351	0.7288	0.0007605	25619	25877.2	21304.3	27251.5	26606.3	25371	33195.3	33009.7	43311.6	30835.5	33582.3	34663.7
Camelliagenin C	C30H50O5	2.3761	2.3778	0.4723	0.0005135	8596.49	8050.56	7752.95	8021.31	7556.29	8708.54	20810.2	16733.6	13333.3	18032.8	22904.5	11283.4
Soyasapogenol B 24-O-b-D-glucoside	C36H60O8	2.3576	2.3289	2.8658	7.613e-07	10684	12737.6	10669	11080.7	11517.4	14280.6	4214.72	4040.91	5413.57	2880.97	5056.03	3164.66
PI(P-16:0/22:6(4Z,7Z,10Z,13Z,16Z,19Z))	-	2.34	2.3278	94.4582	5.07e-08	8692.13	7681.02	6762.36	6462.14	6611.94	9604.95	82.3203	31.8187	254.454	16.3964	67.4656	32.5687
Arachidonoyl dopamine	-	2.3351	2.3195	49.5974	2.737e-08	9054.68	7632.41	6174.35	6898.89	7016.77	9050.75	166.247	203.365	92.538	89.3129	246.525	125.858
PI(17:0/22:2(13Z,16Z))	-	2.3251	2.2786	2.0615	0.000215	17265.8	15801.2	10205	14184	15970.5	20706.8	7139.43	7622.37	7357.33	7991.94	7095.4	8458.82
(±)13-HODE	-	2.3206	2.2959	5.2703	0.003544	8514.1	12693.8	3673.33	16396.2	18459	8109.51	1629.04	1072.81	6122.57	2046.99	702.694	1303.18
cholacalcioic acid / 25,26,27-trinorvitamin D3 24-carboxylic acid	-	2.3195	2.345	0.393	0.0008907	5678.35	5309.5	5699.15	6738.18	6571.97	4973.1	18007.9	16581.9	8310.75	12641.6	21303.1	12159.1
Val Pro	-	2.3031	2.2804	5.3976	4.871e-08	8414.94	9395.6	7165.73	10455.4	9829.28	8176.74	1611.36	1652.67	1891.67	1312.47	1868.2	1562.03
AS 1-5	C40H77NO9	2.2906	2.2696	2.6766	0.003155	13282.1	13765.5	7829.5	16293.2	23857.4	10871.3	4433.46	6207.5	5238.62	7359.11	2979.94	5883.52
7S,8S-DiHOME(9Z)	-	2.2888	2.2899	3.2315	6.596e-08	10768.1	10342.5	11411.2	9622.89	10170.1	11177.5	2799.42	3507.95	5281.4	2084.21	2901.49	3067.92
(24R)-24,26-dihydroxyvitamin D2	-	2.2824	2.2908	0.1975	0.001467	2818.61	1649.55	2258.88	2329.35	1942.97	2057.25	10232.2	8726.78	15009	9312.5	18462.9	4400.48
Atracurium (Quaternary acid)	-	2.2794	2.2499	20.0748	3.305e-07	6842.02	5827.85	6193.86	8006.26	8746.51	9489.79	163.527	331.732	721.811	479.31	194.1	356.499
12-OPDA	-	2.2708	2.2561	5.938	7.509e-10	8597.8	9213.56	7343.6	7908.9	8179.6	9312.18	1393.88	1366.15	1574.65	1330.2	1392.7	1453.75
PC(20:1(9Z)/0:0)	-	2.248	2.2317	0.3403	0.03227	4069.36	6013.81	6955.23	5461.6	3534.74	6310.42	9124.01	8283.75	23251.1	31350.9	4927.62	18130
N-Acetyltyramine	-	2.2474	2.2255	1.5477	2.726e-06	19391.1	19844.4	17782.7	21510.1	22427.9	19745.4	13933.1	13008.8	13258.1	12596.6	11548	13653.6
Uzarigenin 3-[xylosyl-(1->2)-rhamnoside]	C34H52O12	2.2392	2.175	0.2741	0.0149	7464.58	2434.16	1299.55	2904.07	4934.32	2277.88	19920.1	15424.9	7677.12	20104.8	787.618	13837.9
22-Dehydroclerosterol	C29H46O	2.2331	2.2577	0.8125	0.002405	38272.5	42304.4	33142.9	40336.8	35938.4	37814.4	49767.4	41091.5	42945.9	49789.1	51554.7	45259.8
FAHFA(16:1(9Z)/9-O-16:0)	C32H60O4	2.2294	2.2293	3.4095	1.508e-07	9513.81	11702.5	10151.5	8553.41	8408.95	10810.4	2395.62	2954.13	3157.82	3192.45	2661.64	2981.96
Ile Pro Arg Trp	-	2.1618	2.1235	0.0571	0.01097	709.111	657.838	618.132	556.526	319.916	320.679	22425.5	6654.22	4620.12	6188.02	4572.93	11285.2
PC(18:1(9Z)/0:0)[U] / PC(18:1(9Z)/0:0)[rac]	-	2.1543	2.1533	0.4052	0.03091	4186.94	11061.9	10258.4	3710.79	4063.48	6301.64	7802	8631.45	22987.9	24941	8237.2	25064
PS(P-18:0/0:0)	-	2.1439	2.1108	2.4075	1.158e-06	10695.1	9970.49	9337.86	11283.5	10676	13237.7	3909.27	4919.13	5601.93	3784.78	4298.62	4576.92
1α,25,28-trihydroxyvitamin D2	-	2.1397	2.1397	0.3909	0.0005061	4692.63	4867.12	4991.51	4405.99	3912.54	5511.85	12426.1	10925.6	17727.2	8627.47	14303	8563.03
5α-Cholestane-3α,7α,12α,25-tetrol	-	2.1334	2.2015	0.2986	0.0182	4894.88	3738.78	3616.3	3873.21	4461.09	4496.02	13504.9	12693.3	12064.8	7311.94	30585.2	7865.85
RHODOMYRTOXIN	-	2.131	2.1092	1.5938	5.822e-06	16728.4	16752.3	15647.5	18735.9	18476	17672.2	12647.4	10976.9	12230.1	8997.61	9801.39	10617.1
1α,18-dihydroxyvitamin D3	-	2.1294	2.1415	0.1884	0.0001054	1602.25	1734.93	1778.21	1367.85	1698.59	1596.72	8390.1	9100.44	10289	5904.21	12845.9	5387.04
alpha-Tocopherolquinone	C29H50O3	2.126	2.1584	0.3955	0.0009092	5095.33	4990	4130.98	4867.27	4884.14	6168.72	16038.4	10990	11598.4	7589.19	18709.6	11259.3
(3beta,5beta,8beta,22E,24xi)-Ergosta-6,22-diene-3,5,8-triol	C28H46O3	2.1144	2.1102	0.2091	0.001939	2696.22	1843.16	1295.36	2140.35	2156.68	1932.81	6093.2	11701.4	15930.6	9671.97	11050.1	3258.71
Lumichrome	-	2.1025	2.1193	0.2349	0.0005559	1647.58	4252.83	1274.69	1561.67	2004.16	2319.53	8055.91	10633.1	13640.8	6838.05	4719.4	11723.8
12alpha-hydroxy-3-oxo-5beta-cholan-24-oic Acid	C24H38O4	2.0925	2.1583	0.6422	0.04831	19612.8	16655.4	15067	24186.5	23263.3	16643.3	39983.4	35668.8	14626.2	25932.1	42232.1	21294.9
Sterebin D	C18H30O3	2.0857	2.0861	6.8712	7.821e-08	6865.42	7739.01	7758.09	6166.88	5627.91	8433.44	875.298	971.708	1227.6	1077.07	1129.49	916.104
2-Formaminobenzoylacetate	-	2.0637	2.0987	0.5595	0.000611	8064.25	10593.5	4422.45	8487.77	12909	8702.27	19519.6	14820.5	14571.5	15650.6	13884.8	16598.4
PI(20:4(5Z,8Z,11Z,14Z)/22:4(7Z,10Z,13Z,16Z))	-	2.0628	2.0398	207.895	7.77e-08	6067.02	4601.56	4698.8	6025.1	6397.54	7288.35	70.9476	17.1637	7.6613	30.4641	30.7261	11.7354
BENZETHONIUM	-	2.0457	2.0276	0.0588	0.01703	330.784	305.986	1913.09	198.757	168.551	184.419	4688.04	12676.1	1504.02	16119.8	1444.17	16279.4
UVAOL	C30H50O2	2.0452	2.124	0.1559	0.03372	2013.69	1690.09	1774.94	1654.66	1762.62	2036.76	7764.7	15098.9	12012.7	3220.74	29173.8	2853.11
(3beta,22R,23R,24S)-3,22,23-Trihydroxystigmastan-6-one	C29H50O4	2.03	2.0237	0.4585	2.869e-05	5577.49	5260.33	4871.4	4715.86	4750.92	5661.77	10653.8	11256.7	15006.4	10296.1	11055.4	9020.27
DG(16:1(9Z)/20:3(5Z,8Z,11Z)/0:0)	C39H68O5	2.0142	2.0152	2.8021	3.213e-08	9276.11	9399.38	8490.58	8992.65	8120.24	8478.66	2777.51	2446.37	4562.43	3333.64	2668.58	3037.7
9-deoxy-9-methylene-16,16-dimethyl -PGE2	-	2.01	2.0281	0.3351	0.00136	4650.5	5444.33	2093.24	2499.05	2461.81	3720.16	9831.61	11198.8	14955.3	5190.65	13396.8	7715.92
(22E,24E)-1α,25-dihydroxy-22,23,24,24a-tetradehydro-24a,24b-dihomovitamin D3	-	2.0037	2.0068	0.4258	1.523e-06	3603.93	3421.84	4892.19	3812.18	4421.97	5474.9	11333.9	9951.81	10457.2	8132.28	10885.5	9404.45
3β,5β-Ketotriol	-	1.9931	1.9978	0.4488	4.392e-05	5111.8	4303.04	4691.62	5175.39	5051.13	4935.91	10710.2	11552.1	12754.9	9318.76	13225.7	7656.2
(22E)-1α-hydroxy-24-oxo-26,27-cyclo-22,23-didehydrovitamin D3	-	1.9804	1.9418	1.9278	2.14e-05	11378.3	11162.5	9733.1	11313.8	12868.6	13104.1	6287.73	6120.84	7282.59	4023.74	7475.5	4880.15
Cinncassiol A	C20H30O7	1.9741	1.9562	1.9075	3.18e-07	10869.6	11955.6	9646.54	11892.4	12146.4	11537.1	6606.68	5561.74	6733.35	5545.69	5359.97	5862.77
1α-hydroxyvitamin D3	-	1.9663	1.9213	0.4644	0.01066	7165.39	5205.18	6317.95	5866.42	6078.72	5650.33	12704.4	9787.58	19655.6	19119.3	5892.42	10988.9
1,25-Dihydroxy-23-oxo-vitamin D3	-	1.9449	1.955	0.2886	0.0002859	2602.03	2431.2	2691.32	2189.34	2411.91	2318.41	9430.14	8628.81	9574.37	5464.73	12366.6	5278.99
LysoPC(20:0)	-	1.9327	1.9517	0.3711	0.03947	3515.29	6094.42	4500.48	4028.24	3809.76	6640.6	8225.5	6282.02	25304.5	20040.4	4526.97	12652.8
7,8-Dehydro-beta-micropteroxanthin	C27H38O2	1.9161	1.9449	0.705	0.0163	19694.4	15373.8	12439.2	18166.6	17964.5	21898.9	31141.9	25129.7	24745.1	25624.9	15271.6	27779.1
Isohyodeoxycholic acid	C24H40O4	1.9092	1.9122	0.2852	5.849e-06	2399.86	2711.92	2279.35	1465.23	1277.61	2562.2	7364	8003.23	9004.1	4908.38	7953.92	7281.63
DL-Phenylalanine	-	1.9044	1.9962	0.5494	0.03119	7849.74	10282.2	9987.84	8160.1	10720.4	16374.7	18734.7	20751.8	16725.2	11045.3	33760.1	14309.6
24-Dehydroprovitamin D3	-	1.8763	1.853	0.2826	4.902e-05	2721.19	1523.92	1943.92	2117.04	2145.35	1718.19	6861.19	5924.37	9536.44	9114.66	6737.17	4878.45
17alpha,21-Dihydroxypregnenolone	C21H32O4	1.8706	1.8585	0.1122	6.995e-05	820.729	781.36	613.331	532.638	381.619	836.645	9326.85	6089.79	4031.61	5298.74	6528.16	4081.09
PI(22:2(13Z,16Z)/17:1(9Z))	-	1.8692	1.8441	97.2871	1.627e-06	5438.38	3318.89	3762.5	5611.6	4856.73	6491.24	44.0391	115.664	30.7701	17.5579	74.9446	20.0049
Butyl butyryllactate	C11H20O4	1.8652	1.8535	1.714	0.0006924	16596.7	16241.7	9627.12	12077.4	12191.5	13734.3	7161.36	7398.71	9255.65	8132.09	8313.93	6682.29
INDOLE-3-CARBINOL	C9H9NO	1.8638	1.8434	0.3254	0.0005956	2636.1	1991.53	4228.13	2064.28	1636.34	3360.31	6922.9	8805.03	4831.41	11253.5	6355.52	10742.4
Azafrin	-	1.8534	1.8427	0.091	6.95e-05	725.985	619.794	475.237	304.504	550.305	414.839	5874.14	6001.35	8668.03	4482.7	6096.29	2842.61
PI(17:1(9Z)/21:0)	-	1.8316	1.8412	86.4719	0.002292	12725.7	4350.38	3533.07	6620.63	4867.82	3416.66	64.2086	68.5519	66.1683	71.8757	63.8127	76.0746
7b,12a-Dihydroxycholanoic acid	C24H40O4	1.8265	1.7501	1.4449	0.03046	23430.3	20864	17680.6	25708.6	22788.1	20082.7	9488.84	11380.6	9962.97	17099.1	24552.7	17862.3
Ponasteroside A	C33H54O11	1.8202	1.8091	11.9491	2.249e-09	5044.74	5525.46	4141.06	4797.49	4582.29	5483.27	394.512	635.729	448.352	488.511	289.512	218.469
Ganolucidic acid A	C30H44O6	1.8197	1.7977	2.8071	4.192e-08	6572.67	6709.11	6015.57	7240.39	7642.21	7824.48	2343.57	2679.54	2971.98	2297.97	2496.88	2174.57
PE(18:0/P-16:0)	C39H78NO7P	1.8138	1.8359	1.5501	0.004229	17771.5	18663.3	13794	17331.2	17327.4	16192.7	10498.8	9058.79	17582.3	11799.4	7683.58	8605.43
2a-Hydroxygypsogenin 3-O-b-D-glucoside	C36H56O10	1.8134	1.7961	10.0972	3.812e-08	4753.38	4416.24	4632.97	5336.48	4497.21	6278.51	601.147	474.212	762.03	162.036	550.134	413.29
Dehydrophytosphingosine	C18H37NO3	1.8132	1.7966	4.6788	0.005131	5996.2	3736.69	9165.38	3385.94	8679.72	13617.2	1083.12	1132.22	3439.83	865.685	2276	732.362
Trp Tyr Thr	-	1.8122	1.7784	1.4158	0.0002359	16186.4	16922.8	14123.7	18620.5	18163.4	16917.7	12894.9	11989.9	13639.8	9429.55	11136.1	12213
5b-Cholestane-3a,7a,12a,23S,25-pentol	C27H48O5	1.81	1.8258	0.5766	0.002859	9146.96	8074.68	7133.24	8314.78	7992.08	6701.33	16417.9	13832.7	11315.8	11703.2	19086.3	9755.94
DL-a-TOCHOPHERYL ACETATE	-	1.805	1.8811	0.7483	0.03275	22264.6	30003.5	16526.4	20136	23502	24559.8	23291.7	37857.9	34824.7	26643.8	35009.7	25409.8
Lichesterol	-	1.8047	1.7955	0.2025	0.04919	1117.08	1205.3	5267.49	821.241	1043.26	2072.77	3700.56	5013.88	25036.6	5907.92	11704.3	5553.38
2,22-Dideoxy-3-dehydroecdysone	-	1.7929	1.797	0.3911	7.694e-05	3283.86	2971.94	3152.03	3019.97	3157.76	3334.55	7440.58	9413.85	10082.5	6323.63	9509.65	5601.1
Asitribin	C37H66O7	1.7743	1.7526	4.0468	0.0001774	7539.8	7318.92	2462.53	6876.5	7452.19	6202.54	2462.44	1664.33	1563.99	1463.49	999.807	1199.08
(24R)-5b,8b-Epidioxyergosta-6,22E-dien-3b-ol 3-glucoside	C34H54O8	1.7701	1.748	16.2121	1.419e-06	3854.61	3743.67	4407.52	4998.18	4299.76	6582.93	227.804	401.442	474.644	177.389	236.233	202.761
3-beta-Hydroxy-4-beta-methyl-5-alpha-cholest-7-ene-4-alpha-carboxylate	C29H48O3	1.7501	1.7378	0.7041	3.356e-05	12167.2	11999.2	9689.15	9764.86	10264.9	10049	16040.2	13908.5	14081.5	16011.4	14572.8	16204.9
4,4-Dimethylcholesta-8,14,24-trienol	C29H46O	1.7475	1.7707	0.4744	0.0007836	4716.54	4145.82	4688.04	4532.7	3621.32	6059.62	6953.53	10182.7	13230.2	7618.68	12067.8	8470.62
Corchorifatty acid F	C18H32O5	1.7285	1.7034	2.7265	1.32e-05	6305.19	7114.58	5978.63	6257.36	5773.25	8944.2	1663.1	2051.65	3367.87	2337.13	2539.13	2850.79
5a-Cholestane-3a,7a,12a,25-tetrol	C27H48O4	1.7272	1.7384	0.3465	0.01221	3469.84	2974.93	3359.61	2224.1	2757.64	4068.47	8043.59	7483.62	17034.2	3973.3	11932.2	5933.64
DG(14:1(9Z)/15:0/0:0)	C32H60O5	1.7255	1.7162	10.5407	5.81e-09	3868.34	5157.23	4129.05	4945.49	4223.98	4695.55	235.194	339.289	625.373	780.749	266.415	316.125
3a,4b,12a-Trihydroxy-5b-cholanoic acid	C24H40O5	1.7249	1.774	0.598	0.03672	10050.9	8514.05	8120.16	13343	12938.3	9087.31	23737.4	20991	7909.35	14572.4	24207.2	12295.3
PE(15:0/15:0)	C35H70NO8P	1.695	1.6564	1.9964	0.02065	7813.33	9757.82	5319.02	15680.7	17480.9	10150.5	5218.28	5738.75	3683.61	6033.98	4313.94	8162.54
Phe Ile	-	1.6897	1.6556	0.4389	0.005944	3878.96	4143.09	3989.2	4075.73	3735.5	3883.68	15858.6	8432.29	6882.3	7937.55	5808.53	9092.21
17-phenyl trinor PGF2α cyclopropyl methyl amide	-	1.6828	1.6777	1.5991	7.564e-05	11926.2	12221.9	8924.42	11947.7	11809.1	11543.4	7917.15	7163.63	8049.99	7990.26	5975	5677.44
Persicaxanthin	C25H36O3	1.6664	1.6671	0.514	1.358e-05	5376.14	4748.95	3298.3	4607.65	4309.26	3560.3	9077.25	8233.22	7626.85	8265.49	9990.17	7201.39
3β-HYDROXY-23,24-BISNORCHOL-5-ENIC ACID	-	1.6591	1.651	1.9226	0.007127	9606.12	11364.8	11146.5	12956.5	8581.58	9820.31	960.669	2617.35	5195.72	9191.21	5918.37	9131.7
1-oxoprevitamin D3	-	1.6564	1.6723	0.1643	0.001985	1234.01	833.023	647.142	922.926	1058.18	951.284	6146.6	5076.09	7142.04	3594.41	10210	2193.52
(S)-Edulinine	C16H21NO4	1.6333	1.6476	0.6636	1.079e-05	8042.38	7892.79	7021.58	8534.5	7729.29	7725.43	12207.8	11494.2	13031.7	10005.3	12667.1	11307.3
(±)-Equol	-	1.6274	1.6165	0.24	5.375e-07	1395.04	1474.95	1183.57	937.636	901.003	1117.28	5155.07	5138.78	3452.21	5766.97	4798.25	4891.71
7α,12α,25-Trihydroxycholest-4-en-3-one	-	1.6227	1.6239	0.1101	1.027e-05	640.713	411.664	397.861	355.778	590.918	465.44	4158.5	3755.3	5778.55	3601.73	5710.3	2990.33
3'-O-Aminopropyl-25-hydroxyvitamin D3	-	1.6159	1.6346	0.0615	3.467e-05	119.828	269.045	347.435	216.223	353.098	264.557	3701.97	5296.1	3399.33	2706.09	6475.02	3934.05
15-deoxy-△12,14-Prostaglandin J2-biotin	-	1.6114	1.5896	0.0346	0.004401	229.357	255.968	182.347	143.828	82.2145	85.4673	10299.6	4184.08	2503.48	2905.07	2429.88	5980.82
(22E)-1α-hydroxy-22,23-didehydrovitamin D3	-	1.6055	1.5875	0.2199	0.0006167	1584.09	786.635	1333.27	1116.3	1287.37	774.695	4311.69	3914.34	8699.68	6078.5	5243.99	3044.57
W123	-	1.6033	1.6042	0.3034	0.001224	1522.7	2060.14	3023.09	1458.33	1609.93	1535.94	7189.6	6206.17	8315.1	2717.33	8302.51	4209.86
Methyl (3b,11x)-3-Hydroxy-8-oxo-6-eremophilen-12-oate	C16H24O4	1.6026	1.6047	0.1346	4.103e-06	1013.66	435.423	245.983	506.203	607.971	661.15	5813.61	3999.23	3827.79	2914.65	4785.87	4448.01
Ile Ile Arg Pro	-	1.6017	1.5698	1.742	0.0001198	8817.22	8518.82	8182.13	8816.81	8042.69	10924.5	4341.13	4479.91	6091.29	4577.85	6878.87	4227.96
(22R)-1α,22,25-trihydroxy-20-epivitamin D3	-	1.597	1.585	0.2131	0.002391	1098.42	1187.14	1375.07	913.667	1268.58	1224.97	5439.71	5829.76	10071.1	3959.45	5726.97	2132.5
3-Methyl-5-pentyl-2-furanpentadecanoic acid	C25H44O3	1.5898	1.614	0.6053	0.03	10965.6	9321.97	7499.06	5988.64	8373.11	10185.2	13876.6	11991.8	21403.5	8140.64	19899.3	11135.7
9S,11R,15S-trihydroxy-2,3-dinor-13E-prostaenoic acid-cyclo[8S,12R]	-	1.5863	1.5837	2.3991	5.247e-05	6012.65	6038.52	7209.82	6066.7	6755.28	6651.25	1898.92	2040.08	4851.03	2019.42	3676.36	1658.57
5,6-dehydro Arachidonic Acid	-	1.5796	1.6166	2.2099	0.01738	9013.08	12302.4	4677.46	13170	11287.3	5519.8	4455	2059.63	6268.75	7614.57	684.999	4245.59
Lys Ile Leu Val	-	1.5696	1.5844	0.3798	0.0004597	2690.01	1885.56	2511.08	2247.24	2219.82	3165.03	7555.99	6925.29	5977.11	4881.72	9276.46	4136.01
Purpurenin	C37H66O8	1.5508	1.5458	1.9592	0.0002679	7360.17	8625.18	5356.39	8138.28	8147.71	8173.06	5618.07	3425.63	4447.64	4145.44	2087.05	3649.73
DG(16:1n7/0:0/18:2n6)	C38H68O5	1.5502	1.5384	54.0777	2.374e-07	3065.01	4407.49	2540.44	3475.63	3844.55	3034.44	2.0175	23.8533	120.752	57.1485	98.9696	73.9509
(23S,25R)-1α,23,25,26-tetrahydroxyvitamin D3	-	1.5428	1.5443	0.4591	0.001644	3284.64	2931.92	3854.86	3145.61	3856.36	3523.64	6956.61	7394.31	11376.8	5075.22	8541.55	5518.18
7alpha,12alpha,26-trihydroxycholest-4-en-3-one	C27H44O4	1.535	1.5348	0.2326	1.535e-05	1111.18	837.645	958.218	983.558	1194.44	1223.57	4070.71	4513.16	5654.94	4443.28	5660.27	2765.83
7,8-Dihydro-14-hydroxynormorphine	-	1.5345	1.5171	1.9226	0.0003944	8074.73	8714.66	5301.37	8039.29	8426.31	7172.24	4592.47	2992.82	5875.84	2896.03	4307.53	3119.06
16-Dehydroepicalcitriol	-	1.5309	1.5326	0.2917	0.0005079	1832.78	1559.65	1657.23	1390.63	1477.13	1424.89	4661.48	6354.05	7460.6	3772.95	6875.75	2900.17
Camelledionol	C29H44O3	1.5307	1.5351	0.2405	4.211e-05	1258.47	1461.73	846.846	693.541	1082.06	1370.86	6284.98	4572.37	4014.31	3204.17	5942.91	3893.98
4-Acetylzearalenone	C20H24O6	1.522	1.5059	1.5603	4.135e-06	8764.48	9119.37	8045.51	9504.61	10156.8	9145.72	6504.36	5854.81	6440.32	5174.15	5379.21	5726.28
Cholestenoic acid	-	1.5126	1.5228	0.228	0.0003097	1128.17	1220.22	1197.92	772.459	974.053	1208.16	4183.42	4798.33	6166.45	3193.85	7177.8	2981.54
LysoPC(18:0)	C26H54NO7P	1.4816	1.5183	0.5578	0.03417	5628.98	6850.86	5113.37	6194.43	5474.51	6411.15	7615.91	4956.63	16045.1	15594.6	7373.52	12385.6
Palmitic amide	C16H33NO	1.4792	1.4918	0.7773	0.002047	11921.8	13138.4	13792.6	12850.9	14424.1	12569.6	16590.8	15772.6	16665	15902.9	15406.6	20938.3
3-epidihydrotachysterol2	-	1.4717	1.4618	0.3382	0.001617	2381.08	1261.13	1854.1	2165.17	1754.5	1670.28	4710.24	4387.91	8694.43	5661.39	6566.81	2768.86
Icaceine	-	1.4714	1.4554	4.5965	2.252e-08	3679.4	4095.07	3014.25	3705.78	4238.06	3857.74	701.231	759.493	695.886	832.365	1144.79	780.64
1-(O-alpha-D-glucopyranosyl)-29-keto-(1,3R,31R)-dotriacontanetriol	-	1.4628	1.4801	2.0483	0.0001815	6629.09	6427.47	7738.85	6704.51	5768.88	6658.96	2762.72	2193.25	5484.52	3473.88	1885	3693
PS(14:0/18:1(9Z))	C38H72NO10P	1.4603	1.4473	2.9519	4.629e-07	4462.52	4293.12	3624.93	4328.95	4955.15	5222.05	1881.07	1176.54	1787.61	1643.23	1190.08	1431.86
LysoPC(18:2(9Z,12Z))	C26H50NO7P	1.4579	1.4932	0.4678	0.02985	3601.67	8091.51	3325.41	2606.25	4250.91	1947.06	6149.88	5579.93	9480.9	10117.8	4745.75	14846.2
[12]-Gingerol	C23H38O4	1.4565	1.4671	0.3522	0.0001217	2159.99	2685.1	1216.67	1235.54	1264.58	2180.14	4884.37	4877.75	6958.89	3386.63	5606.8	4778.99
2-Deoxycastasterone	C28H48O4	1.4531	1.4833	0.3488	0.002629	2246.68	2031.51	1898.49	1615.87	1826.98	2641.24	5411.59	7299.51	5563.34	3464.59	9659.45	3747.78
Ile Leu Pro Phe	-	1.4458	1.4387	3.1659	6.764e-07	4321.77	4546.6	3536.8	4562.36	4682.58	4108.36	2262.77	1346.64	1471.51	882.284	928.694	1246.08
Polyporusterone F	C28H46O5	1.434	1.4343	0.478	0.002259	3600.54	2603.49	3447.57	3019.78	3021.58	3831.35	6902.65	6547.9	10000.7	4868.4	8162.71	4358.82
5alpha-pregnane-3,20-dione	-	1.4311	1.4414	0.3131	0.01881	737.353	2245.21	3145.41	2897.82	2338.04	313.133	1121.28	4177.41	5775.36	9408.5	10952.9	5858.16
C16-OH Sulfatide	-	1.4297	1.4545	1.5497	0.03153	12412.3	13077.3	11747.1	11587.4	12559.8	15457.3	12394	13190.2	3379.18	10137.6	6315.02	4180.83
13(S)-HOTrE	-	1.4264	1.4122	20.2201	4.159e-06	2401.09	4349.15	2117.99	2924.21	3332.17	3060.46	216.493	154.747	128.285	119.127	125.4	155.454
Lansioside C	C35H56O7	1.4252	1.4333	0.1338	0.01364	746.561	429.808	555.87	701.672	447.463	845.133	10078.2	4298.98	3474	1335.87	6783.17	1877.2
(12S,15S)-15-O-Demethyl-10,29-dideoxy-11,12-dihydro-striatin C	C25H38O6	1.4222	1.4049	5.8672	8.31e-05	2920.61	3656.95	3316.95	2880.66	3119.79	5842.22	757.187	595.573	1088.93	564.16	402.921	296.341
Macrophorin C	C22H32O5	1.4046	1.4129	8.4828	2.281e-08	3080.61	3637.35	3645.64	2736.51	2663.68	3024.54	301.536	374.8	472.196	297.603	407.613	360.851
9-Oxohexadecanoic acid	C16H30O3	1.4003	1.3942	0.2004	0.001873	1081.3	457.823	1012.83	847.185	858.275	685.775	2279.72	2282.67	6960	5529.66	4598.74	3018.09
11-Hydroxy-9-tridecenoic acid	C13H24O3	1.3995	1.3679	1.8776	0.004807	4416.14	9242	7426.18	6238.82	6576.04	9552.78	3621.11	3777.66	4815.39	2362.99	5707.95	2857.09
LysoPA(0:0/18:0)	C21H43O7P	1.3926	1.3864	0.0864	0.03741	515.658	808.021	48.7731	427.433	176.716	376.013	2554.04	1063.11	11599.4	7875	2021.81	2108.83
Leucyl-Valine	C11H22N2O3	1.3893	1.3786	0.4867	0.0002645	2536.31	3283.21	2809.54	2474.81	2865.92	3041.88	8128.88	5974.79	6098.68	4321.09	5288.2	5139.37
24-Nor-5β-cholane-3α,7α,12α-triol	-	1.3859	1.3908	0.3449	0.0001344	1652.67	1840.89	1663.08	897.571	1365.99	1978.58	4145.8	3536.31	6334.04	3459.47	5544.85	4226.46
3alpha,7alpha,12alpha-trihydroxy-5beta-cholestanate	C27H46O5	1.3795	1.4033	0.272	0.0001656	932.774	1162.27	968.829	837.005	945.292	1965.72	2159.74	5132.5	5181.48	3339.16	4914.44	4311.29
PS(DiMe(11,3)/MonoMe(13,5))	C49H84NO12P	1.3744	1.3473	2.3809	0.0003796	4440.06	5772.37	2664.97	4557.76	6210.55	5912.61	1940.37	2071.63	1999.59	2172.07	1928.41	2298.96
25,26-epoxy-1α-hydroxy-23,23,24,24-tetradehydrovitamin D3	-	1.3727	1.3493	2.6298	1.158e-05	4217.48	3907.63	3123.47	4558.74	5196.12	4825.05	2106.44	1495.64	1959.78	1157.34	1698.96	1404.75
16,16-dimethyl-PGA1	-	1.3675	1.3766	0.252	0.0005893	1247.12	1850.25	937.014	479.437	531.6	1148.9	3597.3	4668.49	5982.25	1735.37	4778	3812.23
Tyramine	C8H11NO	1.359	1.4248	0.5342	0.03138	3720.11	4928.45	4871.73	3837.77	5086.92	7896.6	9148.27	10292.5	8003.52	5355.19	16957.9	7039.13
Asp Arg His	-	1.3552	1.3416	20.6527	1.767e-07	2860.32	2960.22	1736.34	2733.02	3064.27	2592.7	102.117	94.2832	281.819	70.1386	188.772	35.1639
Nonate	C9H16O4	1.3522	1.3087	1.7349	0.02987	5654.97	10186.3	8546.71	6551.03	7211.01	14782.4	4085.9	5816.71	7263.7	3559.32	5767.84	4014.27
LysoPC(16:1(9Z))	-	1.3486	1.3091	0.6053	0.009755	4530.4	4264	7644.28	4636.98	4321.26	4859.7	6415.78	6845.52	12085.6	9754.19	7249.01	7637.54
(20R,22R)-20,22-dihydroxycholesterol	-	1.3479	1.3529	0.4409	0.001647	3169.18	2247.58	2652.11	1863.15	2096.27	2666.41	5615.47	4755.1	7726.29	3333	7395.34	4504.84
Tuberoside	C34H56O8	1.3418	1.3339	3.456	1.472e-06	3257.64	3739.42	3024.33	3625.44	3594.68	4219.93	1855.29	990.048	1073.07	944.52	438.503	906.23
CerP(d18:1/16:0)	C34H68NO6P	1.3409	1.312	33.1775	0.000278	2591.98	3453.97	424.683	3089.01	3548.1	3500.79	156.732	27.7182	70.2861	49.7827	164.174	31.8584
Anandamide (20:l, n-9)	-	1.3204	1.3249	0.2461	9.58e-05	888.195	1132.39	761.268	566.719	988.446	831.763	1911.52	3972.41	4191.79	4234.13	2522.1	4171.66
Glutaminylvaline	C10H19N3O4	1.3202	1.2816	1.3915	0.001616	9601.42	9743.41	8030.05	10903.2	10817.3	10257.1	7956.43	7549.62	8071.02	5003.82	7680.82	6392.2
pregn-5-ene-3,20-dione-17-ol	C21H30O3	1.3194	1.3195	0.445	0.001519	1973.95	2568.22	3255.38	2104.34	2123.59	2082.88	6061.14	5447.72	6798.42	2772.8	6613.84	4003.4
N-cis-tetradec-9Z-enoyl-L-Homoserine lactone	-	1.3152	1.3225	8.6078	4.583e-05	3517.23	4517.04	2346	2404.93	2781.67	2274.42	191.098	182.741	329.103	980.056	81.8526	308.422
Tyr Ile Leu Arg	-	1.3026	1.2754	7.5006	0.0002118	2506.11	2714.73	2357.4	2238.66	2651.96	5123.24	268.536	628.881	387.803	180.063	547.981	331.943
21-hydroxyallopregnanolone	-	1.2971	1.3125	0.2107	0.004031	235.263	1599.07	1624.99	226.51	1025.74	230.741	981.188	3641.5	3427.47	4100.22	6956.66	4347.22
3α-Hydroxy-5β-chola-7,9(11)-dien-24-oic Acid	-	1.294	1.2597	1.2367	0.007823	16087.1	15916.5	14499.7	17045	14408.3	15479.7	11611.5	11103.1	11351.8	12912.5	16363.1	12217.2
DGDG(18:4(6Z,9Z,12Z,15Z)/18:4(6Z,9Z,12Z,15Z))	-	1.2806	1.2726	67.8783	6.938e-08	2915.71	2247.09	1671.04	2297.46	2308.34	2344.65	6.8537	7.3173	7.0629	92.2393	6.8114	82.7468
Pregnanediol-3-glucuronide	C27H44O8	1.2765	1.2964	0.4472	0.001608	2148.34	2222.41	1761.83	2169.91	2011.54	3439.3	3405.56	7535.31	6271.88	4356.25	4891.27	4292.32
3alpha,7alpha,12alpha-Trihydroxy-24-methyl-5beta-cholest-23-en-26-oic acid	-	1.2756	1.2639	0.4257	6.337e-05	1781.94	2449.21	1848.45	2089.75	1601.37	960.351	3746.65	4126.87	5257.31	4378.12	4626.17	3077.93
24-Tetracosanolide	-	1.2729	1.2413	0.3847	0.002976	2197.14	1181.9	1912.59	1401.95	1587.36	1781.88	4163.39	3045.78	5763.98	6946.9	3002.24	3232.41
(3xi,16xi,21xi)-12-Ursene-3,16,21-triol	C30H50O3	1.2726	1.3171	0.0435	0.02328	127.335	241.805	191.644	94.8762	126.071	202.445	2379.67	6506.07	3491.44	537.772	8874.69	844.64
AMC Arachidonoyl Amide	-	1.2725	1.2639	0.286	0.004221	526.82	1058.51	1837.24	639.674	497.056	2194.29	3344.04	1579.4	5614.07	5748.12	2509.74	4825.35
xi-7-Hydroxyhexadecanedioic acid	C16H30O5	1.2675	1.2569	0.4334	0.000489	1697.57	1847.33	3239.29	1387.67	1495.65	1929.69	4263.7	4824.54	5826.54	3414.29	5207.9	3225.55
5-Dehydroavenasterol	C29H46O	1.2636	1.2781	1.3562	0.01941	13433.8	14923.5	9158.94	13448.8	13451.8	11583.2	13019	8743.86	10123.1	9051.45	6680.28	8433.68
Ile Glu	-	1.2619	1.279	0.1065	0.003228	524.258	247.445	415.44	143.113	199.863	510.884	5070.24	3225.55	936.554	1947.21	5559.4	2420.47
Undecylenic acid	C11H20O2	1.2408	1.2534	0.6677	0.002594	4506.77	5623.76	6033.19	4165.12	4864.23	7618.41	7341.3	9520.71	8548.01	7220.6	7139.24	9378.54
PI(20:2(11Z,14Z)/22:6(4Z,7Z,10Z,13Z,16Z,19Z))	-	1.24	1.2269	13.7836	8.061e-07	2439.41	1896.62	1744.56	2430.19	2336.66	2986.95	562.409	83.3658	21.2575	192.495	66.1352	77.8966
1α,25-dihydroxy-26,27-dimethyl-22-oxavitamin D3	-	1.2366	1.2272	0.2535	0.001973	1144.84	841.984	731.37	816.9	861.069	855.372	3930.95	2881.97	5983.45	2592.4	3785.51	1542.01
Ganoderic acid eta	C30H44O8	1.2332	1.2072	2.0229	0.0009885	3436.92	6738.86	3704.39	4688.36	4861.32	5180.43	2531.23	2859.78	2036.59	1904.41	2995	1813.34
5-cis Carbaprostacyclin	-	1.2303	1.2318	0.534	0.006664	3155.69	3177.26	3880.43	2417.51	2897.3	3736.43	7657.13	6902.55	7547.83	2892.54	6714.28	4362.02
Tyr Phe Thr	-	1.2302	1.223	2.4945	4.484e-06	3448.42	3655.84	3281.84	3976.68	3963.2	3344.21	1348.55	2095.16	1291.8	1313.05	689.533	1950.66
PI(18:1(9Z)/21:0)	-	1.2294	1.2051	2.535	0.0002118	4163.08	3986.08	2125.62	3355.61	3682.81	5058.28	1379.66	1472.98	1421.76	1544.4	1371.15	1634.62
DG(15:1(9Z)/18:1(9Z)/0:0)[iso2]	-	1.2259	1.2126	3.2943	3.632e-07	2286.24	3405.67	2682.38	3174.22	3056.46	3284.68	939.987	1088.51	920.862	837.234	821.48	822.987
Lucidenic acid M	C27H42O6	1.225	1.2261	0.1544	1.563e-05	205.359	342.51	387.828	508.366	358.804	621.742	2536.64	3390.74	3336.1	2018.82	2726.77	1693.17
MG(0:0/20:3(11Z,14Z,17Z)/0:0)	C23H40O4	1.2214	1.2123	0.2919	0.007817	1469.22	1827.75	815.425	1074.89	952.099	657.175	7203.65	4061.95	1280.55	3521.02	4488.26	2729.27
23S,25,26-Trihydroxyvitamin D3	C27H44O4	1.2212	1.2107	0.1511	0.0002404	574.26	485.827	305.678	329.295	324.396	436	4720.02	2402.36	2216.7	1944	2493.29	2471.85
7-dehydrocholesterol	C27H44O	1.2207	1.201	0.2227	0.002252	970.133	389.269	905.785	670.612	742.706	576.96	2223.06	2201.37	5021.15	4966.3	3070.05	1628.07
(3beta,5alpha,9alpha,14alpha,22E,24R)-3,5,9,14-Tetrahydroxyergosta-7,22-dien-6-one	C28H44O5	1.2202	1.2132	0.3346	6.973e-05	1150.59	997.872	1127.43	1350.66	1222.89	878.412	3092.69	3432.41	4731.86	3189.72	3473.68	2177.84
Cycloartanyl ferulate	C40H60O4	1.2159	1.1996	28.9867	1.808e-05	2328.68	2847.1	878.535	2315.61	2504	2289.15	204.361	13.9377	93.3183	81.3066	52.9244	8.3198
Cer(d14:1(4E)/20:0(2OH))	-	1.2159	1.1925	2.0745	0.0005518	4239.2	4607.06	3473.96	4109.13	5344.91	4777.74	2663.78	1372.44	1442.09	2139.59	3719.8	1458.3
(9Z,12Z,14E)-16-Hydroxy-9,12,14-octadecatrienoic acid	C18H30O3	1.2092	1.1939	20.1614	5.072e-07	1597.65	2339.52	1766.69	1925.65	2339.82	2769.62	116.477	110.073	94.0203	113.218	97.5635	100.234
1α,25-dihydroxy-11α-phenylvitamin D3	-	1.2084	1.2419	0.5393	0.009651	3673.12	2938.28	3558.44	3458.01	3097.74	3821.17	6441.72	7512.17	6502.71	3403.42	9704.95	4529.95
Obtusilactone A	C19H32O3	1.1995	1.1967	3.3065	0.0003061	3697.48	4672.16	1925.22	2878.62	3676.92	2598.46	1404.94	1365.54	886.423	884.788	568.672	770.665
(24R,25R)-25,26-epoxy-1α,24-dihydroxyvitamin D3	-	1.197	1.1998	0.506	0.0006241	2545.86	2418.43	2015.56	2430.44	2215.99	2721.54	4577.72	4665.43	6208.59	4326.45	5653.21	2920.56
SM(d18:1/12:0)	C35H71N2O6P	1.1967	1.1718	1.7849	0.009349	7082.91	7241.06	2132.53	6075.93	6554.56	5912.22	3348.76	3131	3837.78	2529.06	3844.12	2915.01
Panatellin	C35H64O5	1.1962	1.1936	4.4683	5.737e-08	2919.46	2639.65	2261.4	2522.04	2308.55	2728.79	368.895	425.718	828.34	831.474	321.018	665.98
Leucylproline	C11H20N2O3	1.1809	1.2089	0.5296	0.001617	2344.81	3430.52	2513.58	2313.19	2927.51	3204.44	4540.45	6199.94	5050.12	3691.3	7433.06	4683.96
9'-Carboxy-gamma-chromanol	C23H36O4	1.1794	1.1587	0.1096	0.001037	353.83	375.541	164.033	163.845	177.462	409.952	4827.9	2161.25	1759.48	2539.37	1568.17	2149.23
11beta,17beta-Dihydroxy-4,17-dimethylandrost-4-en-3-one	-	1.1777	1.1795	0.3007	7.757e-05	879.42	774.519	1232.74	831.866	910.275	813.145	3812.44	3381.45	2923.9	1767.8	3721.38	2488.05
HU-211	-	1.1736	1.1615	0.3345	4.001e-06	962.356	1203.67	1070.15	826.602	983.448	830.211	3131.39	3650.1	2983.43	2950.36	2760.65	2093.01
24-Norursa-3,12-dien-11-one	-	1.1734	1.1604	0.283	0.002816	1141.43	944.786	624.022	1264.28	812.489	784.042	5834.7	2797.21	1579.06	3588.49	3434.58	2451.57
Alisol C	-	1.1691	1.1892	0.4819	0.001847	2406.96	1404.6	2251.53	2182.06	2035.06	3162.19	4503.73	5423.07	5200.02	3191.57	6395.37	3175.74
2-hydroxyhexadecanoic acid	C16H32O3	1.1641	1.1437	0.6059	0.008377	3690.45	2523.26	6076.31	2393.57	2889.52	5278.85	5048.22	5475.42	7920.2	6537.8	5901.3	6840.05
Soyacerebroside I	C40H75NO9	1.1584	1.1698	1.9279	0.004826	5140.16	5847.53	3679.88	4597.04	7452.43	3762.18	2673.99	2702.43	3064.53	3138.71	957.629	3272.64
19-Methoxypomolic acid 3-arabinoside	C36H58O8	1.1522	1.1447	0.248	0.000213	784.086	787.042	593.07	793.004	593.201	501.15	3525.28	3963.67	1595.34	2462.59	2148.52	2639.71
Ophiobolin F	-	1.1468	1.1611	0.5205	0.0003204	2434.42	1607.84	1538.32	2787.87	2381.24	2967.46	5063.31	4788.94	4984.85	3643.9	3252.54	4616.94
16alpha,27-dihydroxycholesterol	-	1.1443	1.1634	0.6926	0.002397	5420.25	5201.81	5251.37	5050.67	4954.42	5793.02	7471.3	6937.95	8309.98	6240.85	10067.5	6704.98
25-hydroxy-16,17,23,24-tetradehydrovitamin D3	-	1.1439	1.1452	0.5536	0.001	2698.02	2591.65	1965.69	2997.5	2906.5	2708.39	5675.83	5355.45	5661.04	4231.96	2880.1	4864.31
22,23-Dihydroergosterol	C28H46O	1.1433	1.1334	0.2356	0.004643	920.799	463.236	783.133	859.469	624.429	616.025	1896.44	2564.43	5745.11	3547.07	3019	1339.35
Asparaginyl-Valine	C9H17N3O4	1.1412	1.1252	2.0219	0.0001524	4051.97	4046.07	2741.88	4091.93	4373.9	3923.76	2345.06	1494.57	2753.66	1379.64	2122.25	1397.8
1α-hydroxy-26,27-dinorvitamin D3 25-carboxylic acid	-	1.1392	1.13	0.5602	0.0003299	2441.29	2440.52	2718.29	2595.79	2490.43	2772.72	4150.5	4876.07	5676.25	5042.34	4838.91	3012.96
U-74389G	-	1.1373	1.1279	3.2486	0.002509	2513.09	4672.44	1960.55	2826.72	5045.31	2065.56	1101.51	913.045	1047.71	878.761	1101.9	832.302
26,27-dinor-3alpha,6alpha,12alpha-trihydroxy-5beta-cholestan-24-one	-	1.1308	1.1417	0.3105	0.001767	1077.11	1016.78	991.683	793.693	637.736	1483.28	2321.37	4974.9	4233.67	1820.55	3658.25	2314.44
(3beta,23E)-3-Hydroxy-27-norcycloart-23-en-25-one	C29H46O2	1.1244	1.1372	0.6585	0.007824	5060.17	4754.29	4525.58	4332.52	4578.23	4851.9	6606.74	8134.25	8476.77	5554.07	9207.29	4701.71
Pitheduloside I	C30H48O5	1.1195	1.1189	0.6743	0.02188	6328.76	4109.96	3621.16	5176.97	6704.99	5626.51	8883.24	6359.22	6675.1	11124.7	5960.53	7806.77
3 beta-Hydroxy-5-cholestenoate	C27H44O3	1.115	1.1055	0.2495	0.0001209	995.496	606.286	571.566	349.679	614.704	610.711	3553.35	2632.21	2971.78	1603.2	2472.74	1788.31
1-Stearoylglycerophosphocholine	C26H55NO7P	1.1128	1.1087	0.3927	0.01924	1349.55	1621.96	1998.51	1707.14	1479.48	1450.39	3526.42	1786.35	8225.43	3824.6	3416.36	3682.12
simvastatin hydroxy acid	C25H40O6	1.1126	1.11	0.7152	0.004531	5313.56	5517.55	5193.78	5849.52	5993.21	5536.25	7102.98	8944.79	9688.18	7835.78	7627.96	5505.73
13'-Carboxy-gamma-tocopherol	C28H46O4	1.1089	1.137	0.115	0.02128	805.18	430.406	99.1344	109.123	292.007	339.214	4273.72	1869.89	2208.9	1145.39	7271.22	1269.23
Tyr Leu Leu Phe	-	1.1073	1.1175	0.0781	0.001243	212.274	68.1797	161.189	183.115	182.181	254.512	1278.97	2994.88	3611.87	1284.7	3289.22	1136
13'-Hydroxy-gamma-tocotrienol	C28H42O3	1.1035	1.1074	0.1297	0.01251	419.922	540.47	297.339	243.994	367.938	273.822	1904.49	2884.1	6380.46	988.81	2864.49	1495.81
Schleicherastatin 6	C28H46O3	1.1028	1.1153	0.5981	0.03546	5023.37	6702.73	1460.07	4254.66	3891.17	3443.12	8556.59	9747.24	7396.31	4252.84	6992.78	4472.69
3,4-Dimethyl-5-pentyl-2-furanpropanoic acid	C14H22O3	1.1016	1.1044	0.6061	0.000306	3498.97	2440.47	2849.1	2265.62	3110.59	3635.79	4932.13	5400.17	5735.44	3959.77	5097.73	4242.29
5,6α epoxy-cholesterol	-	1.0978	1.0916	0.3459	0.001899	1307.38	934.059	996.631	890.439	1004.98	1308.28	2379.05	2942.86	5032.22	3347.57	3403.62	1522
(3beta,5alpha,9alpha,22E,24R)-3,5,9-Trihydroxy-23-methylergosta-7,22-dien-6-one	C29H46O4	1.096	1.0929	0.1845	0.002495	724.612	293.873	634.3	196.834	374.077	592.705	1842.99	3588.32	4287.8	1669.95	2862.07	1014.62
Asp Arg His Lys	-	1.0934	1.0797	1.3495	0.002551	7610.6	8125.98	6336.96	8493.54	7990.84	8170.35	6082.36	7230.18	6346.86	5328.28	4539.76	5095.77
11'-Carboxy-gamma-chromanol	C25H40O4	1.0875	1.0878	0.0638	0.0001253	92.9702	199.576	118.863	89.6844	70.121	173.089	2707.02	1837.41	2234.05	1154.44	2700.67	1029.31
9(S)-HODE	-	1.087	1.0858	5.442	0.005865	2063.19	5156.98	995.002	2081.42	3444.45	1921.23	342.842	352.903	824.359	555.935	89.7864	712.065
PC(14:0/14:1(9Z))	C36H70NO8P	1.0822	1.0687	1.8107	0.0001287	4297.31	4499.93	2913.72	3510.77	4220.74	4089.02	2210.63	2206.9	2819.32	1612.02	2173.81	1975.18
PG(16:0/19:0)	-	1.08	1.0427	1.8804	0.009261	4690.43	4272.36	3017.13	4688.37	5197.39	4735.35	3128.25	2119.08	2883.73	380.639	4302.91	1335.35
Thymidine	C10H14N2O5	1.0793	1.0627	2.9953	0.03884	3891.61	2859.03	1235.59	7837	5630.3	1260.4	1590.21	1154.25	1315.72	1264.63	976.618	1283.9
PI(19:1(9Z)/21:0)	-	1.0787	1.0774	116.246	0.0001146	3142.22	1407.02	1172.93	1999.83	1607.46	1447.67	7.1647	23.6715	28.2892	5.8584	21.5153	6.2006
Glacin A	C35H64O7	1.0753	1.0568	6.2877	1.86e-05	1479.86	2425.56	1277.72	1759.39	2334.41	2471.85	342.458	120.406	264.549	358.096	424.727	357.927
Polyporusterone A	C28H46O6	1.0732	1.069	0.2592	5.009e-05	641.383	494.135	634.94	795.293	586.658	456.675	2561.97	2828.87	2712.82	1910.7	2652.12	1260.93
HECOGENIN ACETATE	-	1.0705	1.0654	0.7725	0.006198	7576.78	6102.35	6436.43	8424.7	6984.77	7210.87	10874.4	8945.37	7753.68	10296.5	9446.17	8009.07
Physalolactone B	C30H44O6	1.07	1.0727	2.9836	2.539e-09	2470.52	2612.43	2321.74	2467.08	2307.46	2135.65	988.372	715.417	738.123	861.005	718.917	776.14
Galabiosylceramide (d18:1/20:0)	C50H95NO13	1.0672	1.052	20.2577	6.198e-07	1467.03	1462.88	1337.95	1607.54	1730.79	2297.88	53.5493	107.608	124.28	77.5616	110.557	15.4248
5-(10-Nonadecenyl)-1,3-benzenediol	C25H42O2	1.0634	1.0582	8.1446	1.305e-07	2094.57	2118.74	1368.38	1582.45	1736.55	1842.5	204.149	176.637	275.717	240.978	221.887	200.305
PG(O-16:0/O-16:0)[U]	-	1.062	1.0473	0.4939	0.01717	2280	2000.1	1954.1	2326.34	2547.53	1751.08	4386.38	4235.41	7818.88	4128.38	2774.67	2687.55
N-acetyl-S-geranylgeranyl-L-Cysteine	-	1.0586	1.0622	0.3765	0.002442	990.36	1529.66	1135.96	421.782	1047.07	1939.32	2565.31	3247.14	5077.52	2429	3337.91	2098.95
Squamosinin A	C36H62O8	1.0576	1.047	6.1856	3.252e-05	1644.24	2826.18	1189.25	1854.65	2193.82	1966.87	341.341	282.642	536.995	282.878	238.54	205.256
4-Hydroxyproline galactoside	C11H19NO8	1.0505	1.0481	1.5765	4.879e-05	4558.02	4552.82	3900.41	4112.45	5111.68	4772.73	2914.37	2421.15	3431.33	3112.01	2389.7	2860.74
8-hydroxymirtazapine	C17H19N3O	1.0474	1.0468	32.5347	5.848e-11	1506.84	1660.78	1533.23	1649.75	1602.24	1337.02	84.9518	12.3703	111.832	22.3424	43.3076	10.666
2,3-Dihydro-6-methyl-5-(5-methyl-2-furanyl)-1H-pyrrolizine	C13H15NO	1.0465	1.0356	3.2992	0.005954	3569.94	4215.34	2003.7	1552.43	1325.73	4344.43	921.697	804.845	1034.53	630.834	1243.61	520.465
Paramethasone	C22H29FO5	1.0461	1.0361	4.8482	1.851e-07	1700.86	2165.71	1683.71	2147.59	1986.8	1717.11	374.168	450.923	581.416	59.1124	530.297	355.505
13,14-dehydro-15-cyclohexyl Carbaprostacyclin	-	1.0439	1.0313	3.2509	2.147e-05	2332.07	2573.04	1889.19	1811.66	1953.65	3088.17	565.918	745.515	972.734	563.421	693.83	657.571
Tanacetin	C15H20O4	1.0414	1.0315	1.6243	0.000121	4527.07	4684.66	3350.45	3731.13	4214.64	4889.92	2396.45	2539.68	3098.83	2638.52	2278.81	2683.39
12-hydroxy-3Z,6Z-dodecadienoic acid	-	1.041	1.0676	0.8138	0.001399	8032.63	8796.01	7104.8	8229.93	8746.12	8310.08	9700.77	10568	11494.1	9248.03	10131.1	9332.98
LysoPC(16:1(9Z)/0:0)	C24H48NO7P	1.0404	1.032	0.2941	1.37e-05	638.635	420.907	1130.69	526.542	266.48	927.194	2121.27	2227.32	2829.67	2022.6	2354.36	1743.72
Pangamic acid	C20H40N2O8	1.0385	1.0721	0.6951	0.04209	5143.52	4182.58	8472.51	4441.48	4596.82	7096.48	6325.57	9079.71	7046.36	8482.8	11414.2	6470.99
Ile Phe Thr Phe	-	1.0341	1.0163	49.2921	7.307e-06	1547.17	1537.42	781.689	1447.18	1796.54	2084.02	14.6725	9.1458	54.4616	64.3762	8.5136	35.3024
Glu Ile Trp	-	1.0325	1.0277	1.5875	4.239e-06	4106.6	4066.67	3664.94	4530.44	4249.24	4135.24	2609.77	2441.06	3022.43	2899.07	2392.3	2231.89
L-Glutamate	-	1.0281	1.0305	2.3902	0.0007841	2678.75	1670.56	3557.87	4180.43	2919.21	2817.51	1107.09	1634.39	1387.34	1292.97	832.626	1202.98
Ala-Thr-OH	-	1.025	1.0197	0.4555	3.234e-07	1297.98	1512.07	1323.3	973.113	1144.77	1086.42	2412.54	2734.45	3057.06	2542.24	2553.05	2810.26
Cathasterone	-	1.022	1.0189	0.1789	0.0008671	676.302	198.695	416.114	411.373	279.312	251.421	1909.44	1811.1	3067.71	1841.93	3079.74	771.255
alpha-Micropteroxanthin B	C27H40O2	1.0199	1.0361	0.5704	0.0002868	2415.6	2003.8	1531.66	2307.77	1994.44	3061.33	4055.75	3970.3	4863.05	3333.69	3578.2	3539.5
1,25-Dihydroxyvitamin D3 3-glycoside	-	1.0178	0.9995	12.9893	6.432e-06	1360.94	1288.86	1310.36	1630.18	1484.74	2360.29	22.4237	165.832	143.186	72.3027	255.521	67.443
Oxindole	-	1.0177	1.0408	0.0968	0.04688	233.159	89.8446	657.263	164.957	44.0671	440.734	622.525	1544.86	5874.17	945.721	6713.08	1140.52
N-decanoyl-L-Homoserine lactone	-	1.0157	1.0089	7.2337	5.926e-08	1659.42	1794.69	1309.4	1675.51	1896.56	1563.14	249.977	294.08	50.6432	298.559	74.2515	400.965
Valproic acid glucuronide	C14H24O8	1.0147	0.9801	0.3366	0.006272	803.647	638.45	1805.33	857.62	636.724	666.037	3164.12	3262.77	1873.42	3750.3	651.794	3368.52
Centellasaponin C	C48H78O19	1.0147	0.9764	0.3803	0.03535	1321.78	1692.4	1162.69	997.053	953.738	1672.91	6313.29	2367.93	2421.34	5398.01	620.692	3384.58
9'-Carboxy-alpha-chromanol	C24H38O4	1.0029	1.0049	0.0499	0.0004478	77.2962	224.808	15.9359	16.4843	26.7088	147.834	2693.96	1702.91	1634.51	876.139	2436.75	848.21
LysoPC(18:1(9Z))	C26H52NO7P	1.0024	1.0101	0.4022	0.002528	1085.98	1763.41	1097.13	1121.43	818.056	1007.63	2144.58	2079.11	3258.72	3637.5	1779.79	4242.13
Asp Pro Lys	-	1.0011	0.9963	3.6498	9.859e-10	1674.15	1752.97	2005.56	1940.01	1881.64	2022.71	393.54	518.923	556.73	502.864	571.714	546.629
PG(O-16:0/16:0)	-	1.0005	0.9952	754.413	1.147e-05	1774.77	2125.53	847.106	1315.39	1390.83	1264.82	1.8063	1.9285	1.8614	2.022	1.7951	2.1401
